# Supplementary material
Source: PubMed Central journal article supplement (PMC4686201)
Supplement: JB.00369-15_zjb999093717so1.pdf [file JB.00369-15_zjb999093717so1.pdf]

| Table S1. Putative two-partner secretion systems under the control of LapG orthologs. |                |                                                           |                   |                   |                                                            |                                                                                                                                                                                                                                                                                                                                                                                 |        |                          |
|---------------------------------------------------------------------------------------|----------------|-----------------------------------------------------------|-------------------|-------------------|------------------------------------------------------------|---------------------------------------------------------------------------------------------------------------------------------------------------------------------------------------------------------------------------------------------------------------------------------------------------------------------------------------------------------------------------------|--------|--------------------------|
| Organism                                                                              | LapD-like      | LapG-like                                                 | CdrB-like         | CdrA-like         | Putative Function                                          | C-term. sequence                                                                                                                                                                                                                                                                                                                                                                | Length | Class                    |
| <i>Pseudomonas aeruginosa</i> PAO1                                                    | PA1433         | PA1434                                                    | PA4624            | PA4625            | cdrA                                                       | QGGLGLVSGNYDLAYQGNLTIKALLNVIADGKTKVYGDADP<br>SLTYQVSLKNGDSAGSILTGGLNRDAGENVGVYGINQGGGLV<br>TSGNYDLAYQGNLTIKALLNVFADAKSKQVGTADPALTQVVS<br>GLKNGDSAGQVLAGGLGRVVGGEAVGQYDILQGGALTSNGYQ<br>LNYQGNLLSILPLVPTPGDLGQLAALSDRLRELQKGRDPDTPGDA<br>VYRTTLENPFLENPFLRAYALGMDVSDPNLPA <b>TAAG</b> PAEDAS<br>AKRVGQFTDRPLRAEAEESGAGCSNQS <sup>Y</sup> LADVW <b>SC</b> FNKPLNF                 | 2154   | Gamma-<br>proteobacteria |
| <i>Methylobacterium</i> sp. 4-46                                                      | none detected  | M446_2406<br>M446_2407<br>M446_4260                       | M446_5786         | M446_5785         | Filamentous haemagglutinin family outer membrane protein   | GLVGGEDASVLGSLTYGGSQAQGNAGSYAITPAGLTSNGYAI<br>TYAPGLTVTKAPLTVTAGNDAKTYDGRAYSGGNGVYAGLVG<br>GEDASVLGSLTYGGSQAQGNAGSYAIT <b>TAAG</b> LTSNGYITFVE<br>GILTVAPRPLTVAAQSRASGQPNPVLTVAVSGLGLVGGDGL<br>AGQLATPATPDSAPGSYPIITQGLTAAASPDYALFLNGTLVTEAV<br>AAAGSAPPVGSVPTASTVTVQLTLNQLSTPYTPPVFQAGLTS<br>QGSPLSDPRFDTPVA <b>CL</b> SQA <b>AC</b> YITPAAPQTGSPSAGR                          | 4855   | Alpha-<br>proteobacteria |
| <i>Burkholderiales bacterium</i> JOSHI_001                                            | WP_009550212   | BurJ1DRAFT_2236                                           | BurJ1DRAFT_1629   | BurJ1DRAFT_1630   | Filamentous hemagglutinin family N-terminal domain protein | QITDANALSGLTSLIGALATSQGDNLNLAGKVAGNLQANSNG<br>GAIGQAGALVTGTTDLKSGTGAIALSNAGNDLQGV <b>TAAG</b> GP<br>VALATVNLKLVSTVNARGALSLTGASISVGVGASTLVGNQFTLLA<br>TGPITLVANTGGIGNVGTEANGLFSNPDLILNPNANSGGMTLTF<br>ANGSIANFVDSQSFRTAGIVISTQNEAKKADVWGCFTGIC<br>VNLDSGLFLANAASATAIAATQEAALLRAFQDNLTAIQRAFI<br>TKIGVPPGIDEIEGDLGGAS <b>CE</b> PKASGSGIQ <b>TAAAC</b> NK                         | 4844   | Beta-<br>proteobacteria  |
| <i>Rhizobium tropici</i> CIAT 899                                                     | none detected  | RTCIAT899_CH0164<br>RTCIAT899_CH0941<br>RTCIAT899_PC05500 | RTCIAT899_PC00675 | RTCIAT899_PC00680 | Filamentous hemagglutinin-like T5SS secreted protein       | AITADTLSKIYGDANPALTYYGGAGLVNGDLSGLSSTAGQ<br>YSNVGSYITGSFSGSNNYALTYYGGSLSVNRALTVTADAKSK<br>TYGDANPTLYAATLLNGDLSGLS <b>TAAG</b> QYSDVGGAYAITQ<br>GSLANANYASYMAGDLTVNQRATVAAADLSRRYGLANPALTY<br>TVGGAGLVNRDRLSGGLATSATSLSEPGAYAITOGTLASANY<br>MNFVPGALTVKATNPEPGTQASSVMPFDSRFAPIRPVSDS<br>TETADGSHDVTDRPFEGT <b>CL</b> DNGNG <b>CV</b> LLPAQATR                                    | 3127   | Alpha-<br>proteobacteria |
| <i>Caulobacter</i> sp. AP07                                                           | none detected  | PMI01_01830                                               | PMI01_02255       | PMI01_02256       | Uncharacterized protein                                    | GVLAATNKTYDGTVAASGSIGLTVAGDTSASGTYAFADKN<br>AGTGKTV <b>TAAG</b> VALSADAGADNYTLAPLATTQADILKGLTAL<br>AAANKTYDGTVAASGSIGLTVAGDTSASGTYAFADKNAGT<br>GKTVTVSAAALTDLGAANYDLGGVSGGLADILRRQVTVAA<br>FKPFGAVDPTLYTAVAGDLAAGDAFTGGLTRDPGVEPGYVIT<br>RGTGLSMNYDLTFTGAVFTIRPFPSSEAGGSMTLKLHLVQSPDF<br>TLDWDPEINLTGGQ <b>AC</b> PGEG <b>CP</b> QAAMSGSAGGRAVATLR                              | 2071   | Alpha-<br>proteobacteria |
| <i>Nitratireductor pacificus</i> pht-3B                                               | none detected  | NA2_18545<br>NA2_18205<br>NA2_09081                       | NA2_17801         | NA2_17806         | Uncharacterized protein                                    | SVNADSKVYDGTAAATGSLGSLGLIGDGVVSGSGSFAFADK<br>NVGTGKTVVSGLGLTGADAGNYTLAPLATTSSADITPATLWVA<br>ANAASMTYDGGVPALGYTYGGLVGGDDASVLTGALASDATS<br>SNVGSYITRGLSAGGNYQJAFADVTITRAVTVRADDLQR<br>AIDEANPDLTYIISGSLVNGDQPSGSL <b>TAAG</b> VNSPAGGYDID<br>QGSLALSANYDLTYLGGVLTILAEPDVPDARPQIHEASPLPV<br>EADDGTTD <b>CE</b> PVIVRENGPVAVHP <b>C</b> NRSYGAWLSAAVE                               | 2053   | Alpha-<br>proteobacteria |
| <i>Sulfuricella denitrificans</i> skB26                                               | SCD_n00417     | SCD_n00420<br>SCD_n00418                                  | SCD_n00416        | SCD_n00415        | Uncharacterized protein                                    | IPLGFSLLFYGTVYTFWANNNGNISFNNGISSYTPFGPQGA<br>PVISPFADVDTRNGTSGMLTLRNDIPNQIIVTWDRVGYSSQA<br>DKLNSFQLVVRGPGYSIPAGEGAIFFYKTMQWETGGASGGSG<br>GFGGTPAAVGGDGNANGIVLVGSIENGISGLVNNHHWFGA<br>NLVPVGEAPVVAATCAQCEVHNALARRVEPLERPTGRELRI<br>AQDGLVLWATGAGVTVPSFGIVTANAASAIAGADPTLLPA<br><b>TAAG</b> GLGLSAGLDAYSIGGTDY <b>CD</b> QVVS <b>GY</b> CLPQAGEKAKQ                               | 706    | Beta-<br>proteobacteria  |
| <i>Comamonas testosteroni</i> CNB-1                                                   | WP_034366034.1 | CtCNB1_3015                                               | CtCNB1_2446       | CtCNB1_2445       | Hemolysin                                                  | AVDAIHHSVAPGAVQGTQAGPAA <b>GAAT</b> ATQTCQGITNAVA<br>GVAAQESSAQASAKVGAATPESTAADASNARSASSQFNIR<br>TTPNTRIPGTSYRQREAGALYLVETDPRFTQYKNNWSSDYM<br>LQALQMDPDTGKRLGDFGEQQLVQQQIGLQTRRFLGNYT<br>SNDEQYDLLQNGATFAQAQGLRPGIELSAAQVAQLTSDIVVL<br>VTKEVTLSDGSRQSVLPVQVYVVRPRRPRRHRHLRGL <b>CE</b> P<br>EPFRK <b>CR</b> Q <b>QR</b> Q <b>HC</b> GPQHLEHHGREHPESGRPDVWQRQA <b>CS</b><br>PAGL | 2629   | Beta-<br>proteobacteria  |
